# Supplementary material for: Identification of a Novel Curcumin Derivative Influencing Notch Pathway and DNA Damage as a Potential Therapeutic Agent in T-ALL
Source: MDPI journal article supplement (doi:10.3390/cancers14235772), 2022-11-24
Supplement: s1 [file s1]

## SUPPLEMENTARY MATERIAL

### LIST OF THE SUPPLEMENTARY MATERIAL:

#### SUPPLEMENTARY FIGURES

- Figure S1.** Curcumin inhibits T-ALL cell growth;
- Figure S2.** Uncropped Western Blots related to main figure 1a and relative quantification of proteins levels;
- Figure S3.** Uncropped Western Blots related to main figure 2a–c and relative quantification of proteins levels;
- Figure S4.** Impact of curcumin on the cell cycle progression in T-ALL cells;
- Figure S5.** Uncropped Western Blots related to main figure 4a and relative quantification of proteins levels;
- Figure S6.** Library of curcumin derivatives;
- Figure S7.** CD2066 is more potent than CD2067 and EC109 in terms of anti-viability activity;
- Figure S8.** CD2066 inhibits DND41 cell growth;
- Figure S9.** Uncropped Western Blots related to main figure 7a and relative quantification of proteins levels;
- Figure S10.** CD2066 reduces N3IC and HES1 protein expression in DND41 cells;
- Figure S11.** Uncropped Western Blots related to figure S10 and relative quantification of proteins levels;
- Figure S12.** Uncropped Western Blots related to main figure 8a–c and relative quantification of proteins levels;
- Figure S13.** CD2066 effects on cell cycle progression in T-ALL cell lines;
- Figure S14.** Uncropped Western Blots related to main figure 10a and relative quantification of proteins levels;
- Figure S15.** Notch signaling activity in distinct leukemia cell contexts;
- Figure S16.** Uncropped Western Blots related to figure S15 and relative quantification of proteins;
- Figure S17.** CD2066 anti-viability effects on Notch-deficient leukemia cells;
- Figure S18.** Uncropped Western Blots related to main figure 11c and relative quantification of proteins levels;
- Figure S19.** Curcumin anti-viability effects on Notch-deficient leukemia cells;
- Figure S20.** Ro3306 inhibits KOPT-K1 cell viability;
- Figure S21.** Effects of single and combined treatment with CD2066 and Ro3306 in KOPT-K1 cell cycle progression;
- Figure S22.** Uncropped Western Blots related to main figure 12e–f and relative quantification of proteins.

#### SUPPLEMENTARY TABLES

**Table S1.** Sequences and annealing temperatures of primers for real-time RT-PCR.

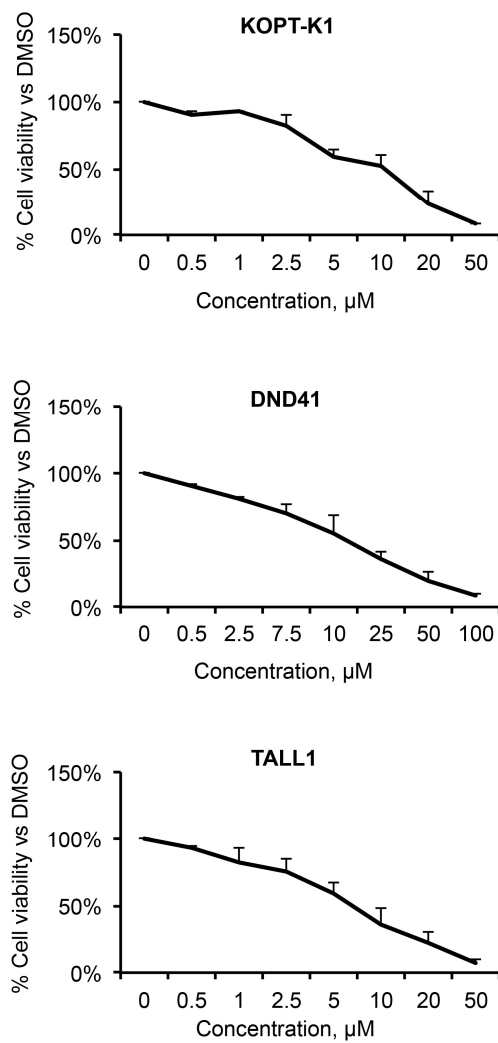

**Figure S1.** Curcumin inhibits T-ALL cell growth. Dose-response curves by Trypan blue cell viability assay towards KOPT-K1, DND41, and TALL1 cells at 48 h incubation times with curcumin. Data represent the mean values of three independent experiments  $\pm$  SD.

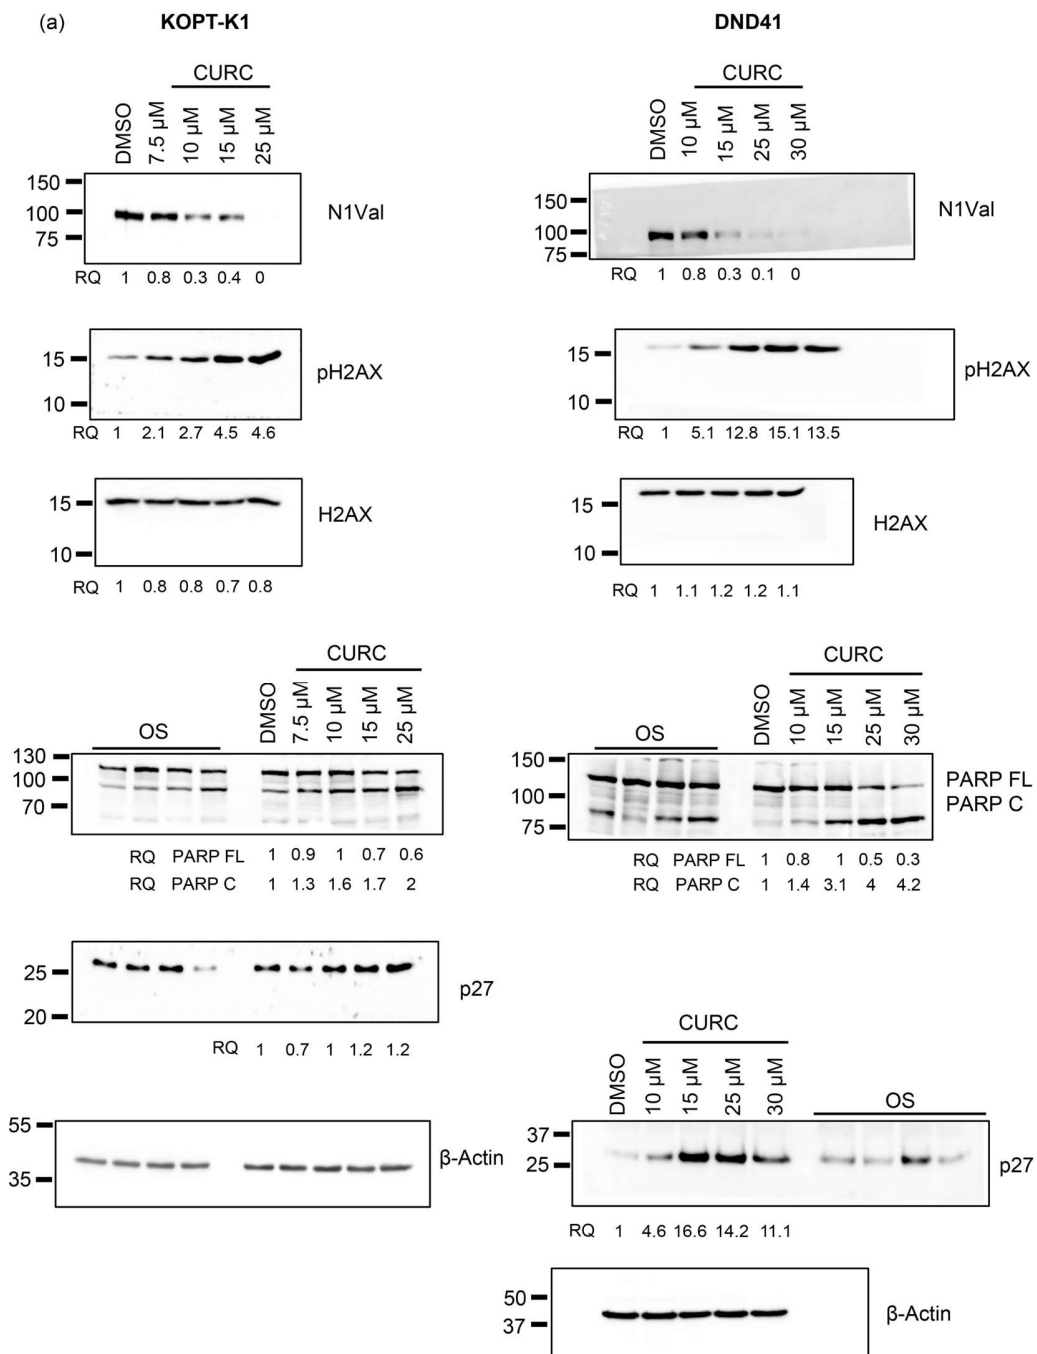

Figure continued on next page

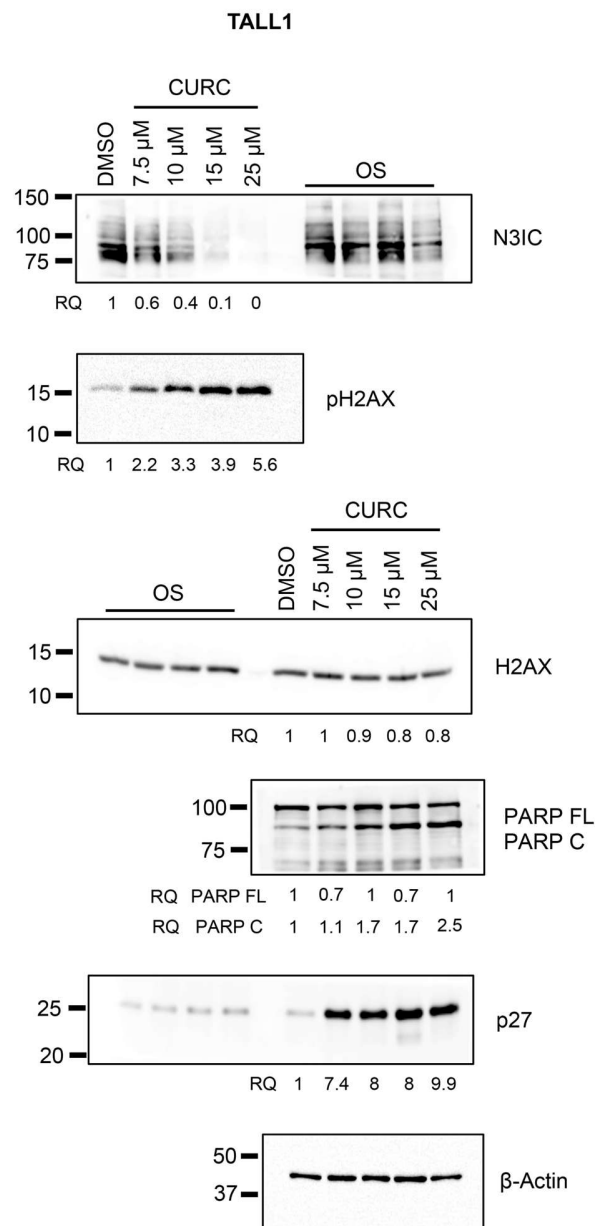

**Figure S2.** Uncropped Western Blots related to main Figure 1a and relative quantification of proteins levels. The expression of each protein was analyzed by densitometry and presented in the figure as a ratio to the control sample (DMSO) normalized to  $\beta$ -actin (RQ). Other samples (OS).

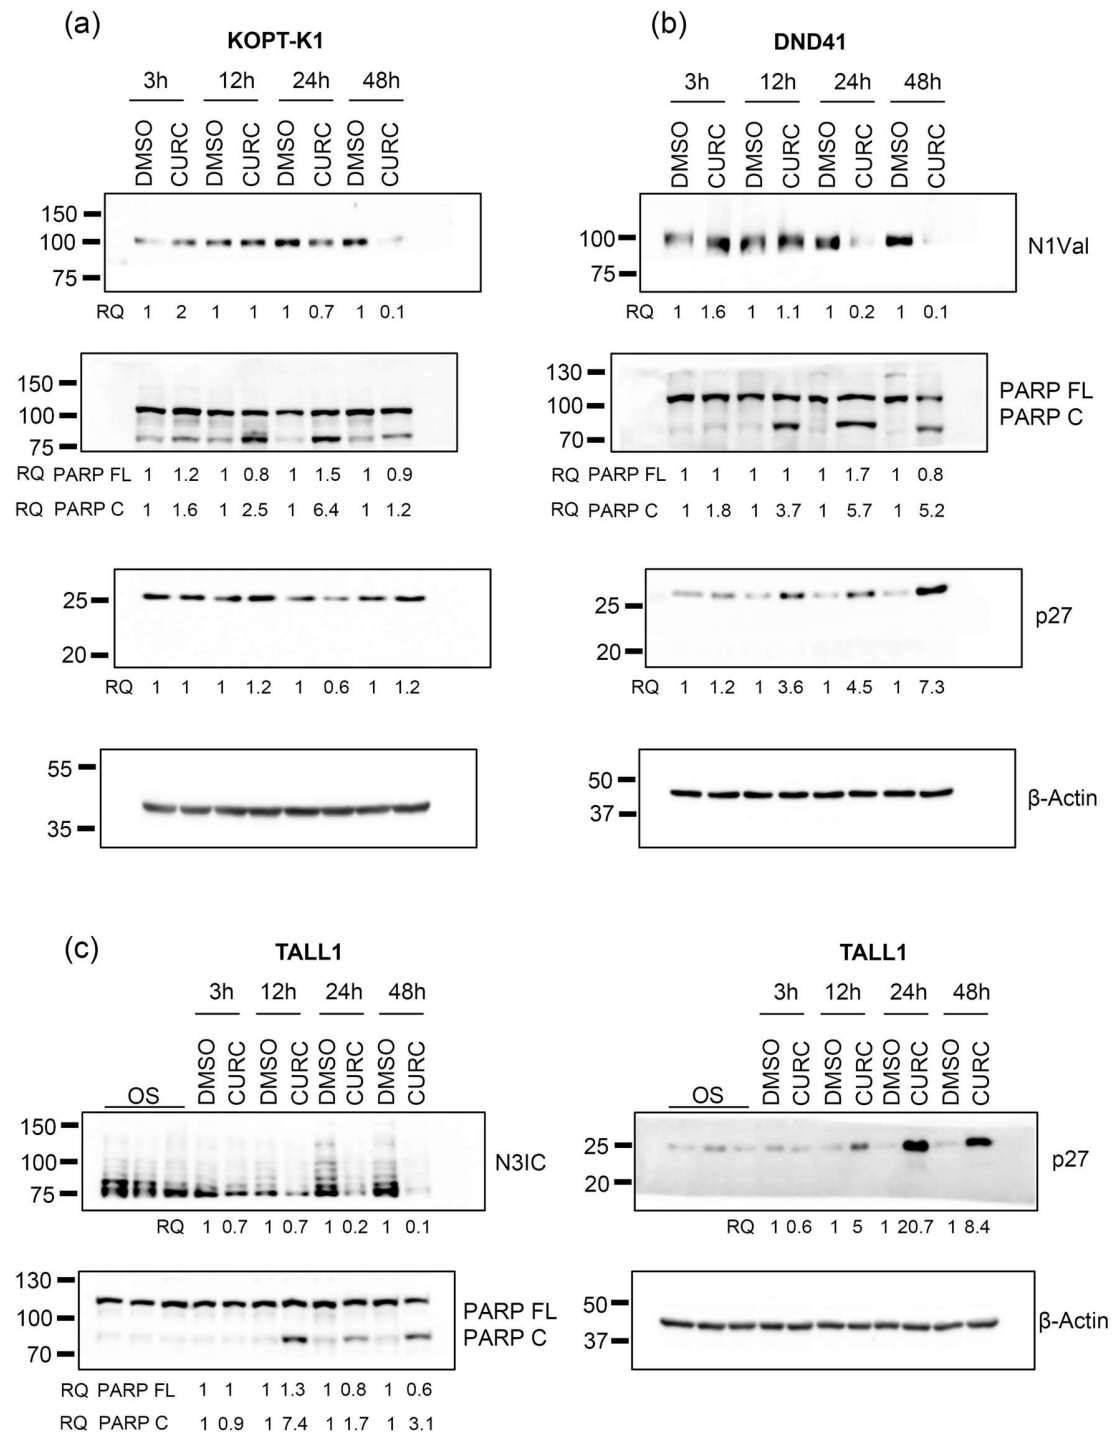

**Figure S3.** Uncropped Western Blots related to main Figure 2a-c and relative quantification of protein levels. The expression of each protein was analyzed by densitometry and presented in the figure as a ratio to the control sample (DMSO) normalized to  $\beta$ -actin (RQ). Other samples (OS).

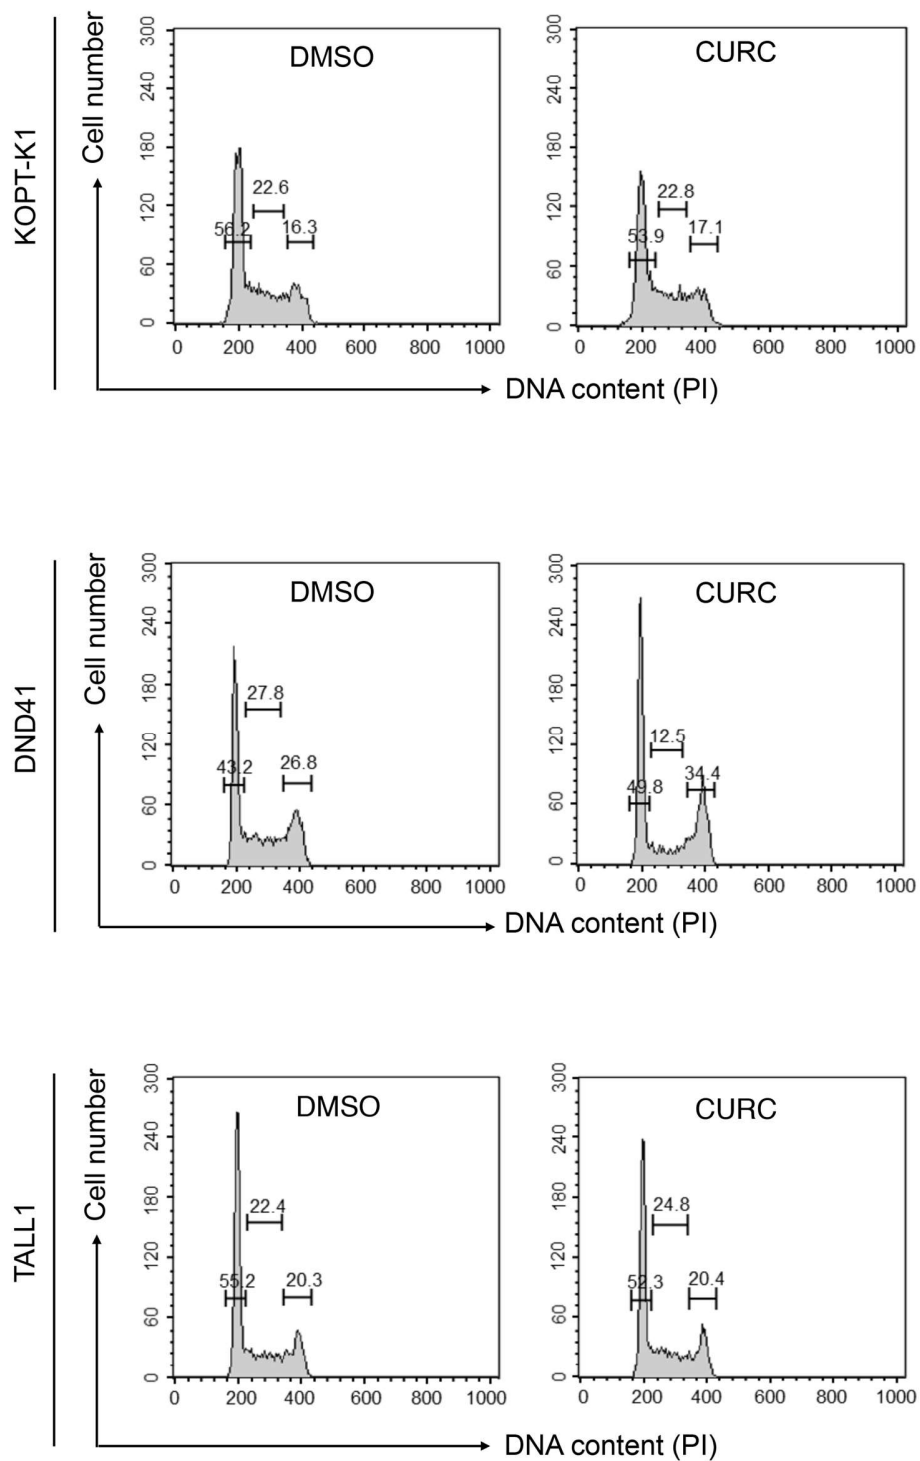

**Figure S4.** Impact of curcumin on the cell cycle progression in T-ALL cells. KOPT-K1, DND41 and TALL1 cells were treated for 48 h with curcumin or vehicle alone (DMSO) with the doses indicated in the main text. Cell cycles were investigated by flow cytometry analysis of DNA content after propidium iodide (PI) staining. FACS plots shown in the figure are representative of results obtained from three independent experiments.

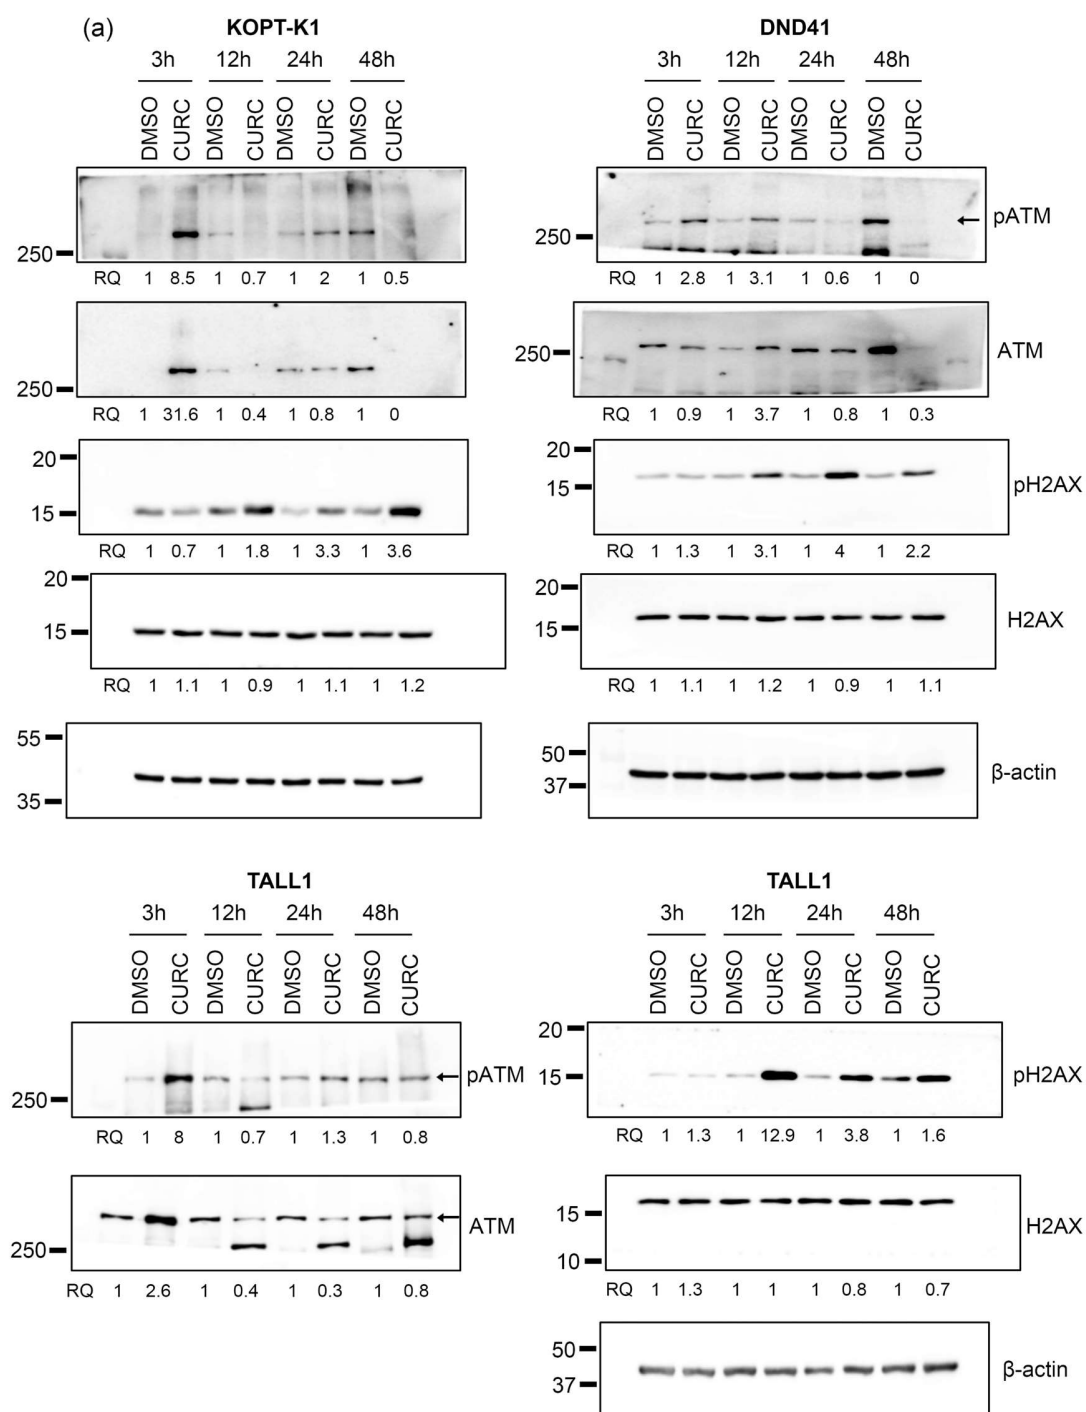

**Figure S5.** Uncropped Western Blots related to main figure 4a and relative quantification of proteins levels. The expression of each protein was analyzed by densitometry and presented in the figure as a ratio to the control sample (DMSO) normalized to  $\beta$ -actin (RQ).

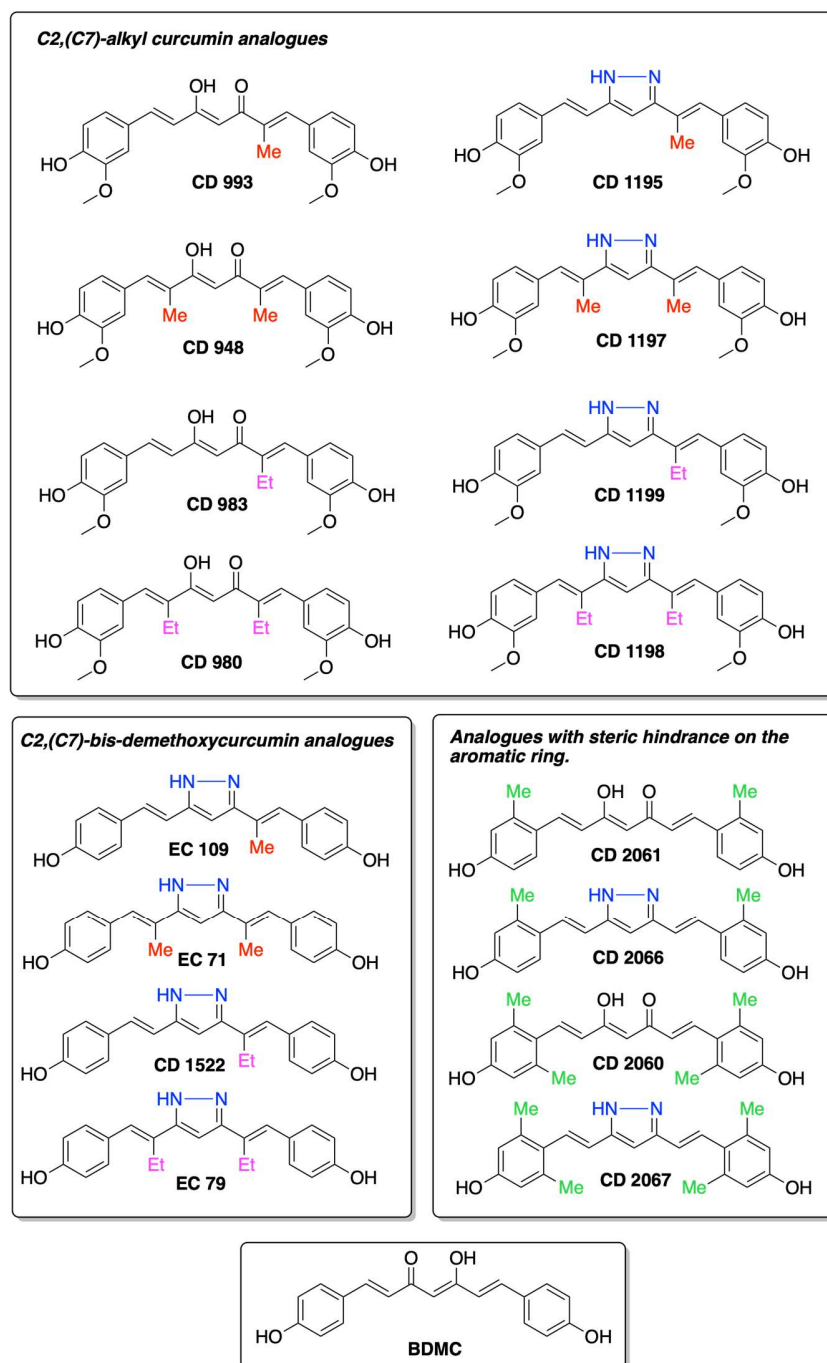

Figure S6. Library of curcumin derivatives.



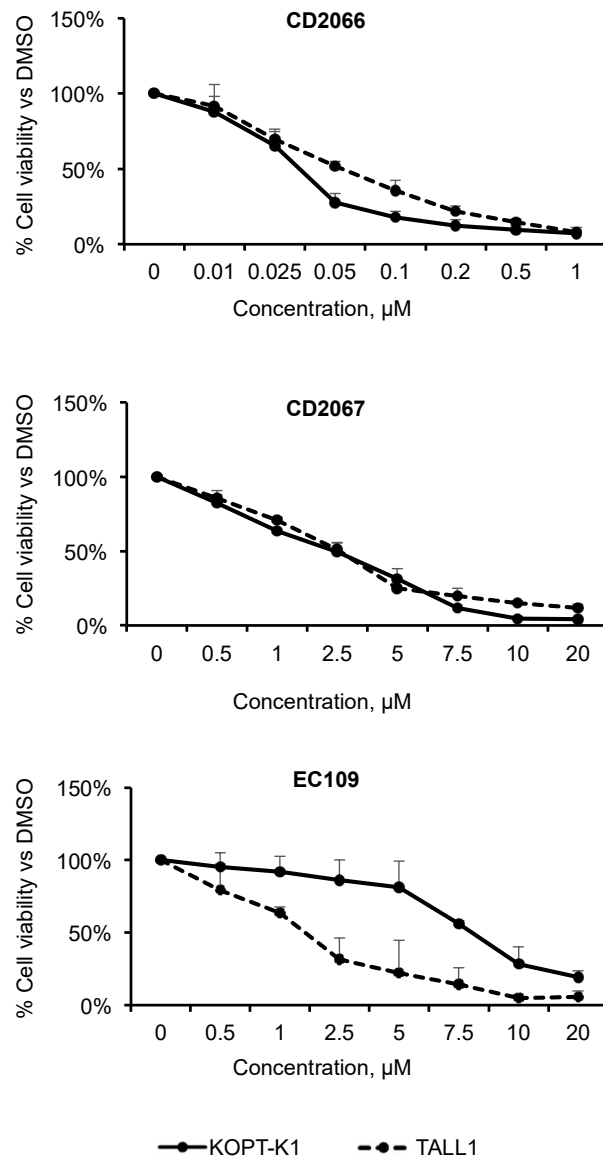

**Figure S7.** CD2066 is more potent than CD2067 and EC109 in terms of antiviability activity. Dose-response curves by Trypan blue cell viability assay towards KOPT-K1 and TALL1 cells at 48 h incubation times with CD2066, CD2067 and EC109. Data represent the mean values of at least three independent experiments  $\pm$  SD.

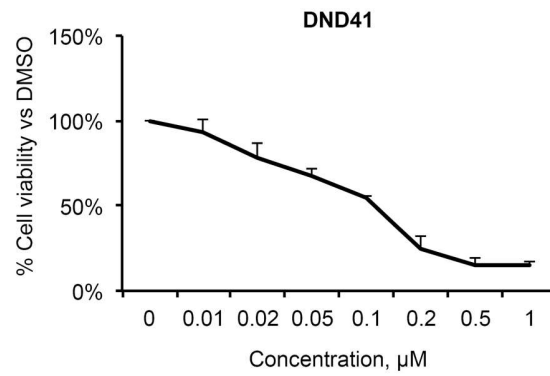

**Figure S8.** CD2066 inhibits DND41 cell growth. Dose-response curves by Trypan blue cell viability assay towards DND41 cells at 48 h incubation times with CD2066. Data represent the mean values of three independent experiments  $\pm$  SD.

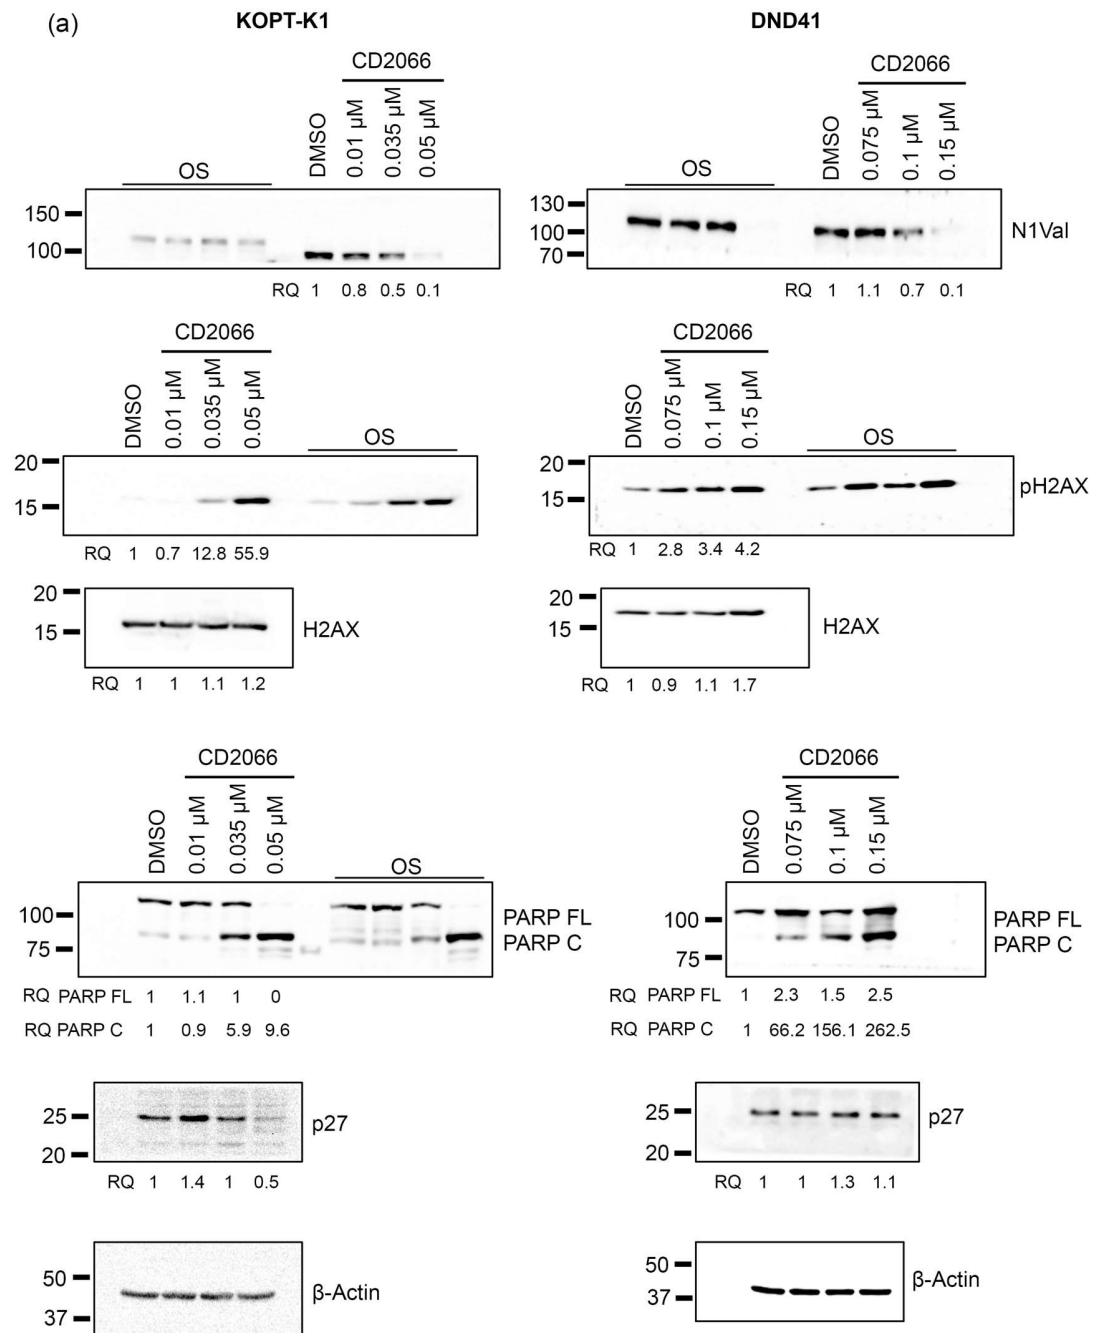

Figure continued on next page

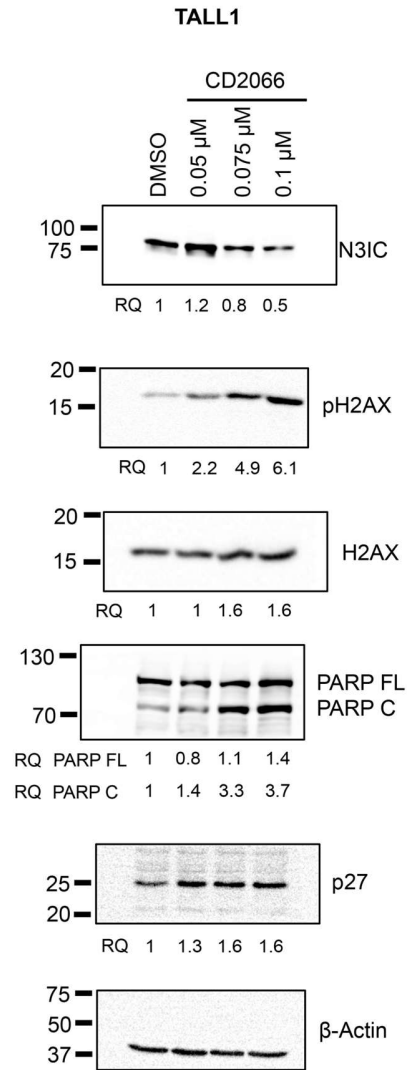

**Figure S9.** Uncropped Western Blots related to main figure 7a and relative quantification of proteins levels. The expression of each protein was analyzed by densitometry and presented in the figure as a ratio to the control sample (DMSO) normalized to  $\beta$ -actin (RQ). Other samples (OS).

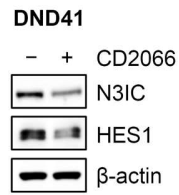

**Figure S10.** CD2066 reduces N3IC and HES1 protein expression in DND41 cells. Levels of N3IC and HES1 following 48 h of exposure to DMSO or CD2066 at the indicated concentrations.  $\beta$ -Actin was used as a loading control. Uncropped western blots and relative quantification of proteins levels related to this figure are displayed in Figure S11.

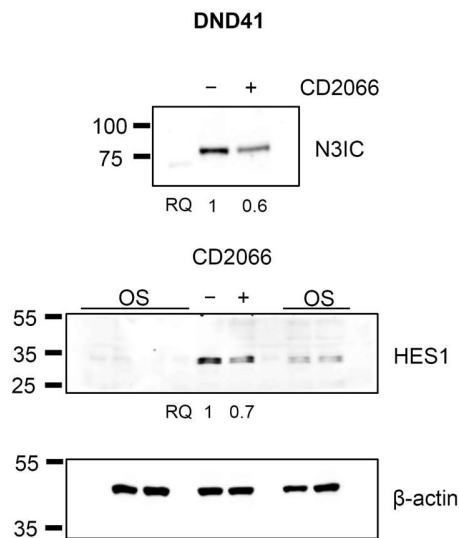

**Figure S11.** Uncropped Western Blots related to Figure S10 and relative quantification of proteins levels. The expression of each protein was analyzed by densitometry and presented in the figure as a ratio to the control sample (DMSO) normalized to  $\beta$ -actin (RQ). Other samples (OS).

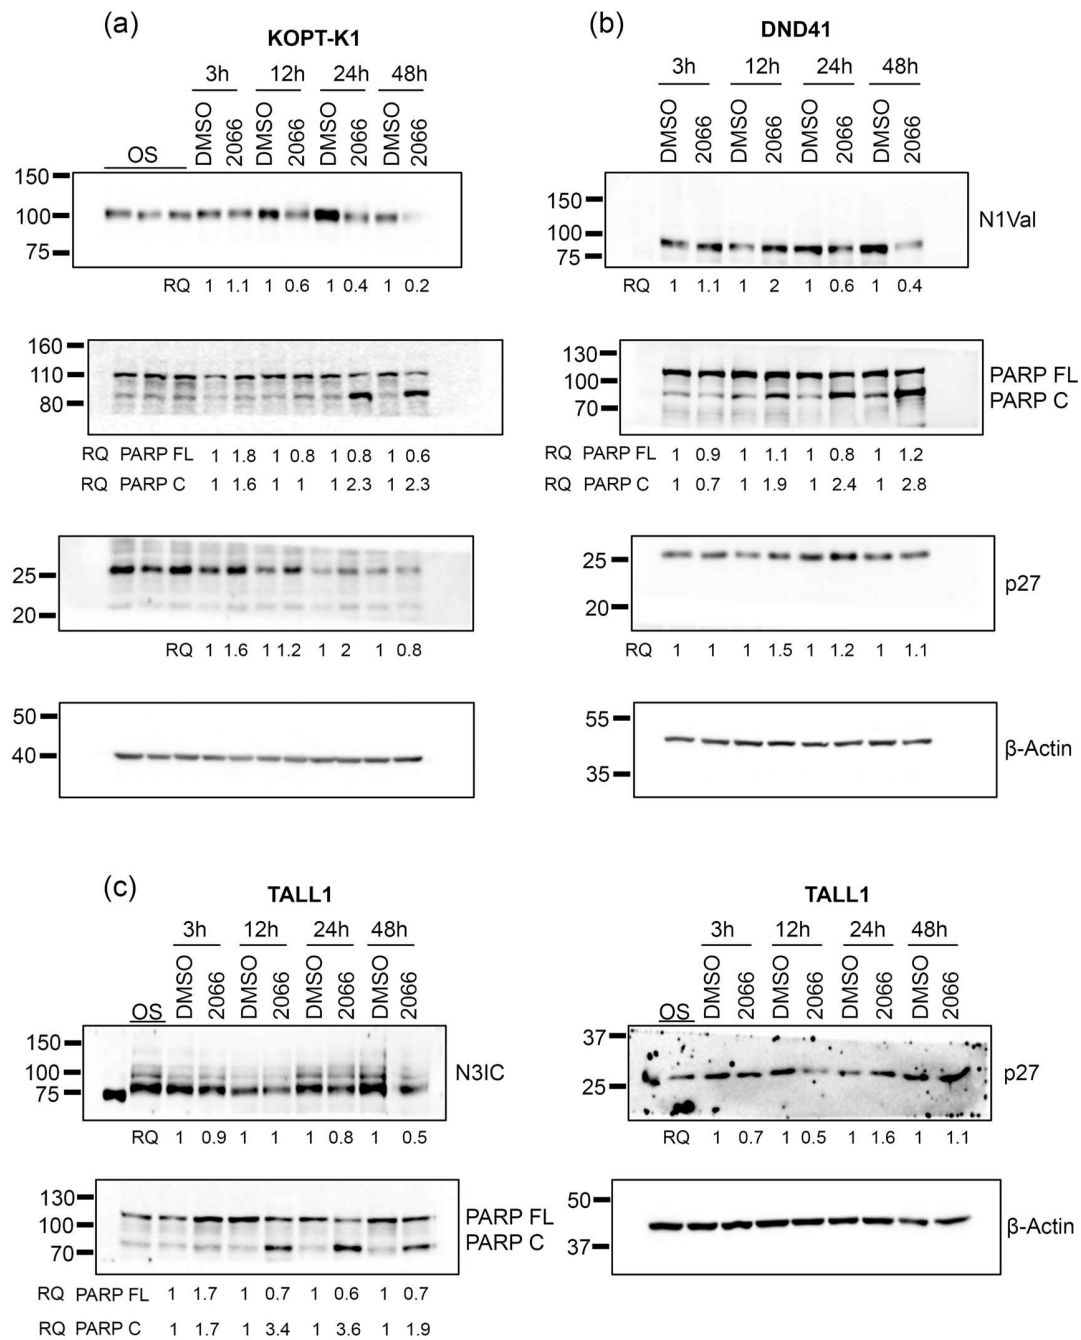

**Figure S12.** Uncropped Western Blots related to main figure 8a-c and relative quantification of proteins levels. The expression of each protein was analyzed by densitometry and presented in the figure as a ratio to the control sample (DMSO) normalized to  $\beta$ -actin (RQ). Other samples (OS).

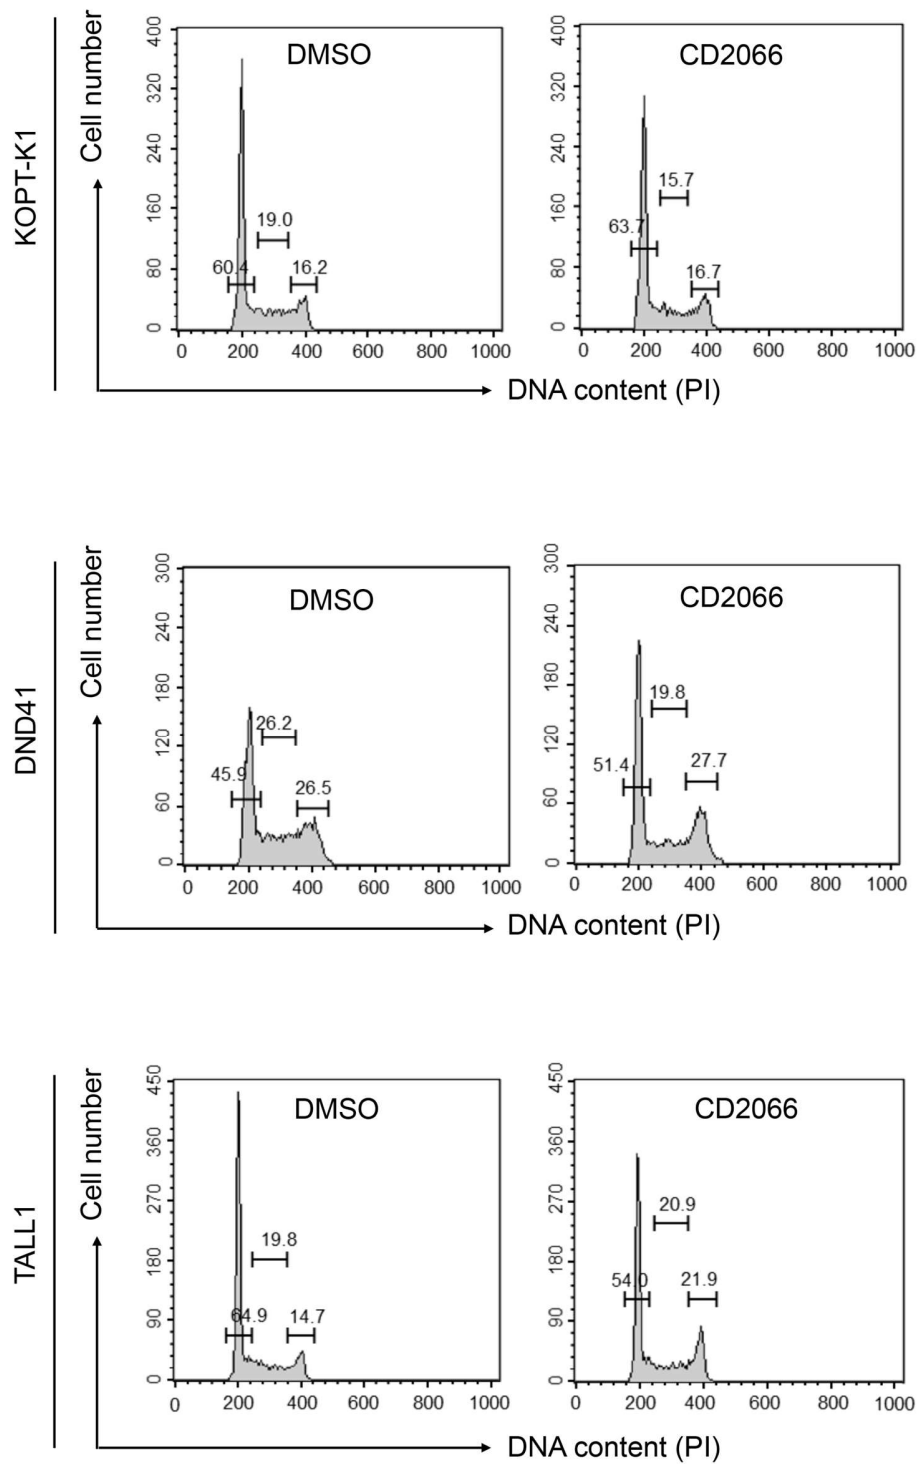

**Figure S13.** CD2066 effects on cell cycle progression in T-ALL cell lines. KOPT-K1, DND41 and TALL1 cells were treated for 48 h with CD2066 or vehicle alone (DMSO) with the doses indicated in the main text. Cell cycles were investigated by flow cytometry analysis of DNA content after Propidium iodide (PI) staining. FACS plots shown in the figure are representative of results obtained from three independent experiments.

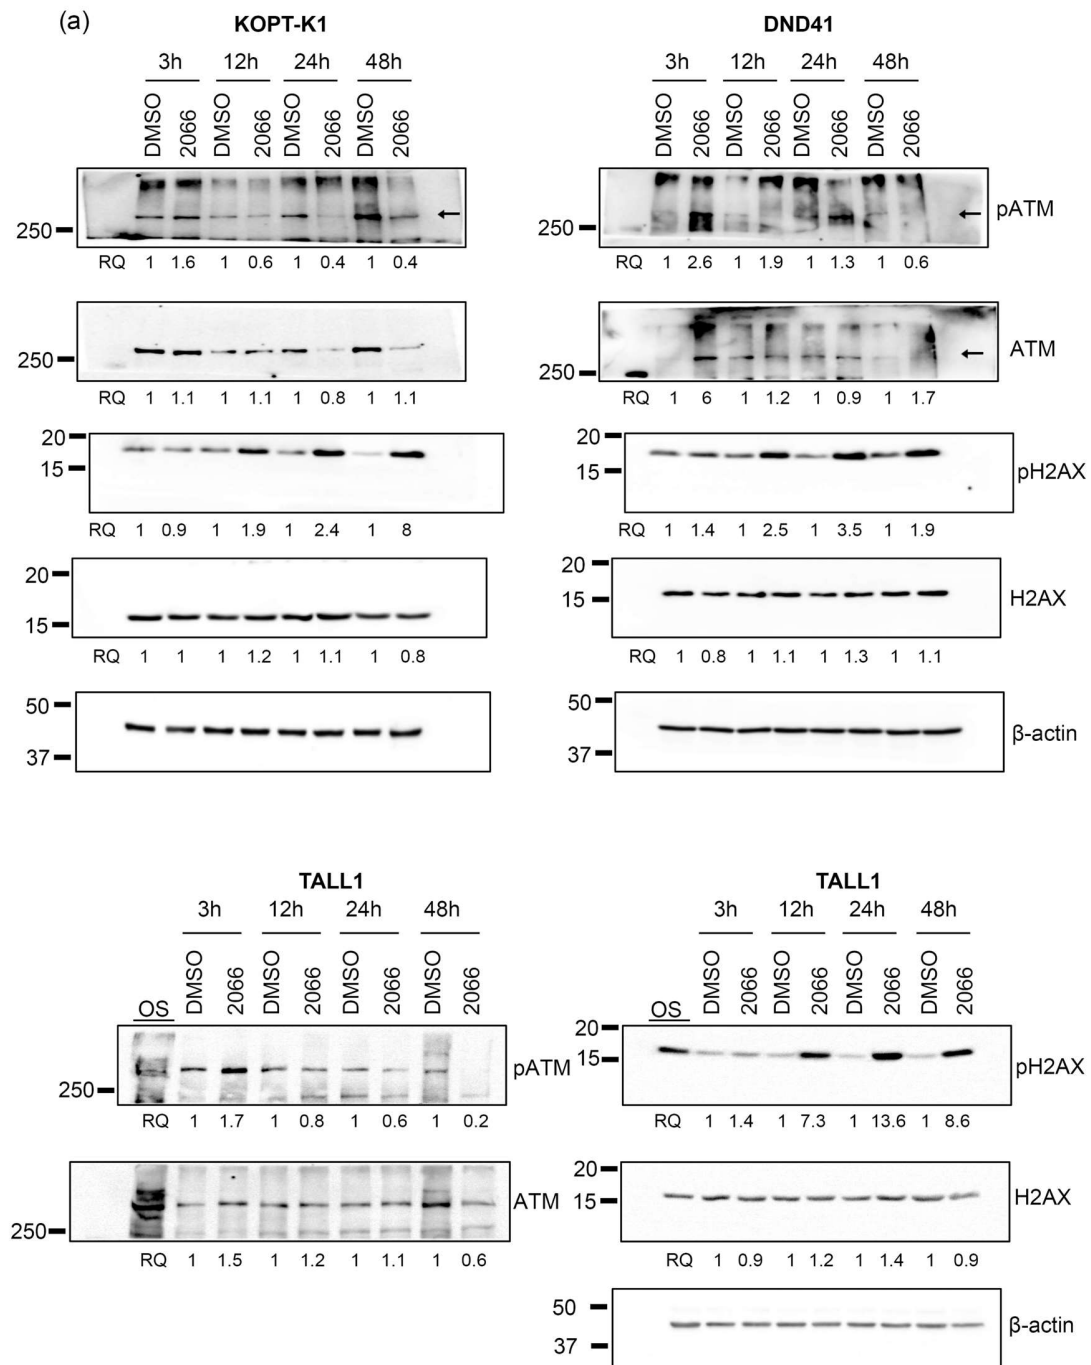

**Figure S14.** Uncropped Western Blots related to main figure 10a and relative quantification of proteins levels. The expression of each protein was analyzed by densitometry and presented in the figure as a ratio to the control sample (DMSO) normalized to  $\beta$ -actin (RQ). Other samples (OS).



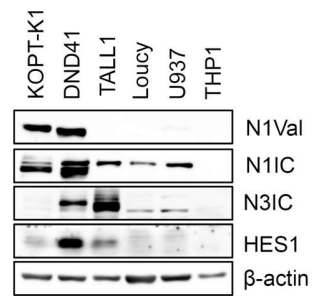

**Figure S15.** Notch signaling activity in distinct leukemia cell contexts. Levels of basal expression of N1Val, N1IC, N3IC, and HES1 in KOPT-K1, DND41, TALL1, Loucy, U937, and THP1 cells.  $\beta$ -Actin was used as a loading control. Uncropped western blots and relative quantification of proteins levels related to this figure are displayed in Figure S16.

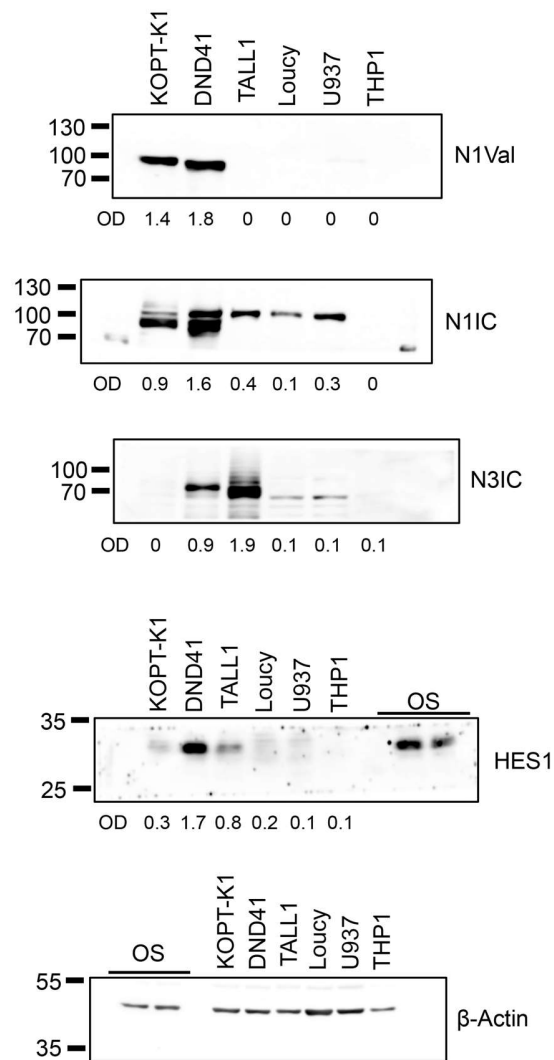

**Figure S16.** Uncropped Western Blots related to Figure S15 and relative quantification of proteins. The expression of each protein was analyzed by densitometry and presented in the figure as values normalized to  $\beta$ -actin (OD). Other samples (OS).

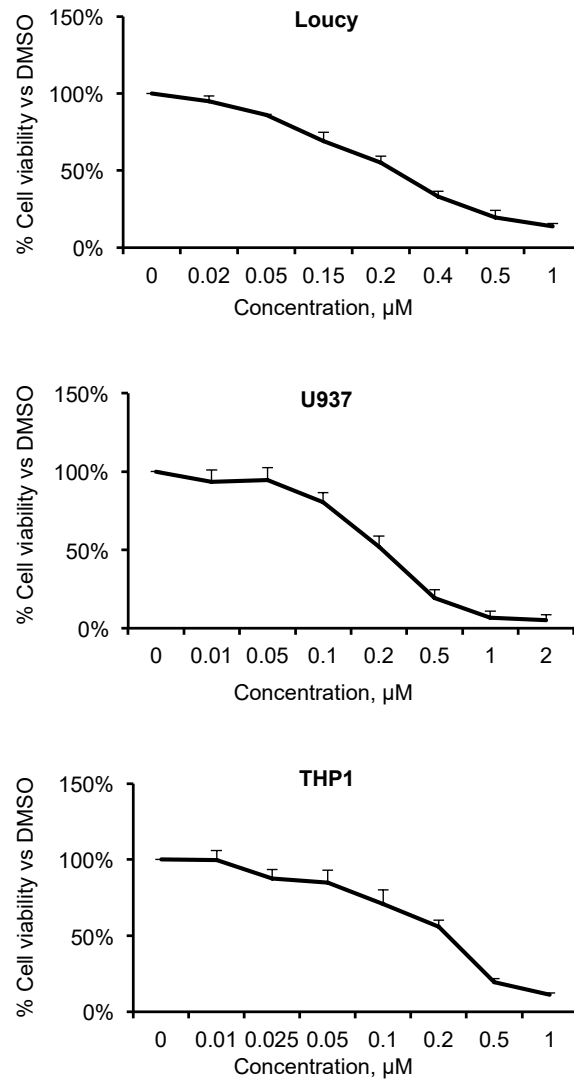

**Figure S17.** CD2066 antiviability effects on Notch-deficient leukemia cells. Dose-response curves by Trypan blue cell viability assay towards Loucy, U937, and THP1 cells at 48 h incubation times with CD2066. Data represent the mean values of three independent experiments  $\pm$  SD.

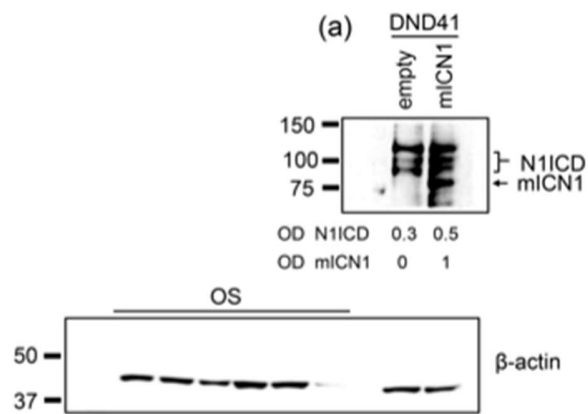

**Figure S18.** Uncropped Western Blots related to main Figure 11c and relative quantification of proteins levels. The expression of each protein was analyzed by densitometry and presented in the figure as values normalized to  $\beta$ -actin (OD). Other samples (OS).

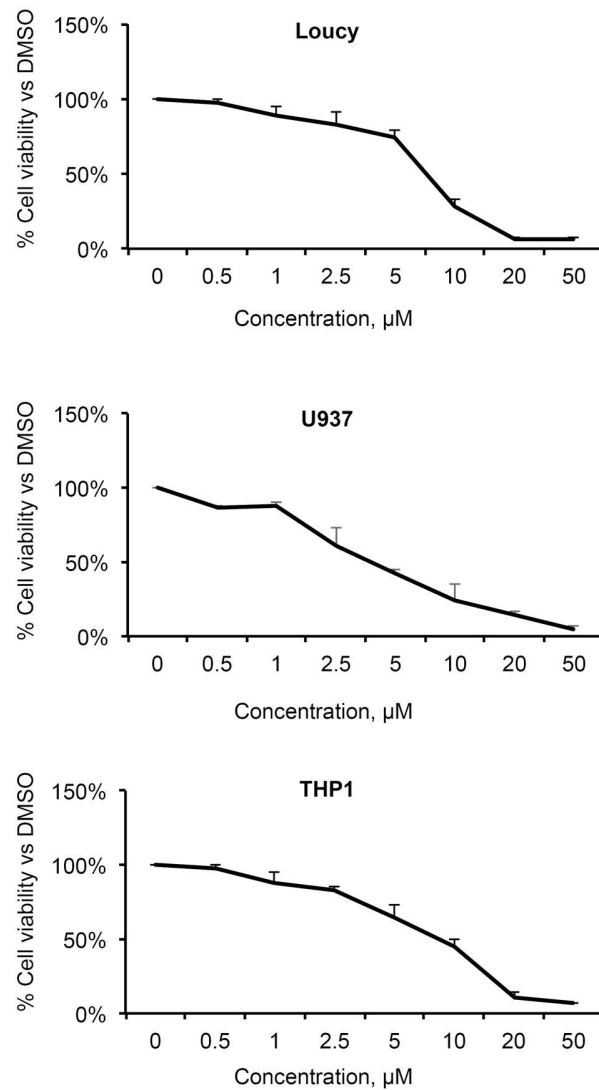

**Figure S19.** Curcumin antiviability effects on Notch-deficient leukemia cells. Dose-response curves by Trypan blue cell viability assay towards Loucy, U937, and THP1 cells at 48 h incubation times with curcumin. Data represent the mean values of three independent experiments  $\pm$  SD.

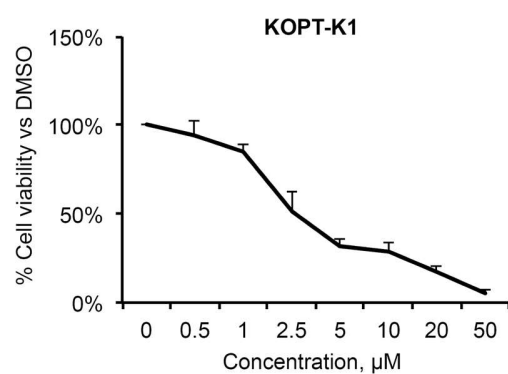

**Figure S20.** Ro3306 inhibits KOPT-K1 cell viability. Dose-response curves by Trypan blue cell viability assay towards KOPT-K1 cells at 48 h incubation times with Ro3306. Data represent the mean values of three independent experiments  $\pm$  SD.

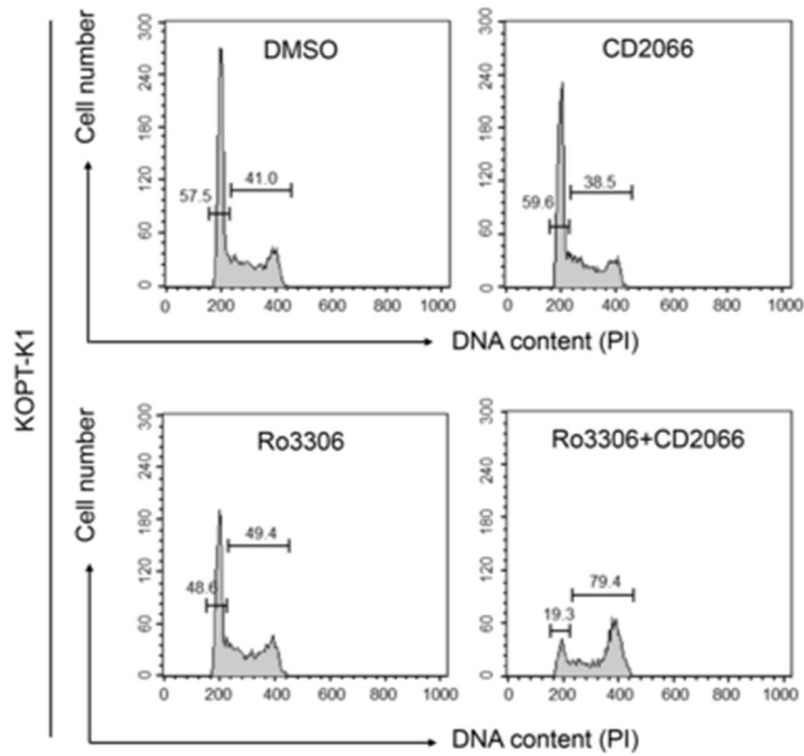

**Figure S21.** Effects of single and combined treatment with CD2066 and Ro3306 in KOPT-K1 cell cycle progression. KOPT-K1 cells were treated for 48 h with CD2066 and Ro3306 alone or in combination with the doses indicated in the main text. Cell cycles were investigated by flow cytometry analysis of DNA content after Propidium iodide (PI) staining. FACS plots shown in the figure are representative of results obtained from three independent experiments.

(e)

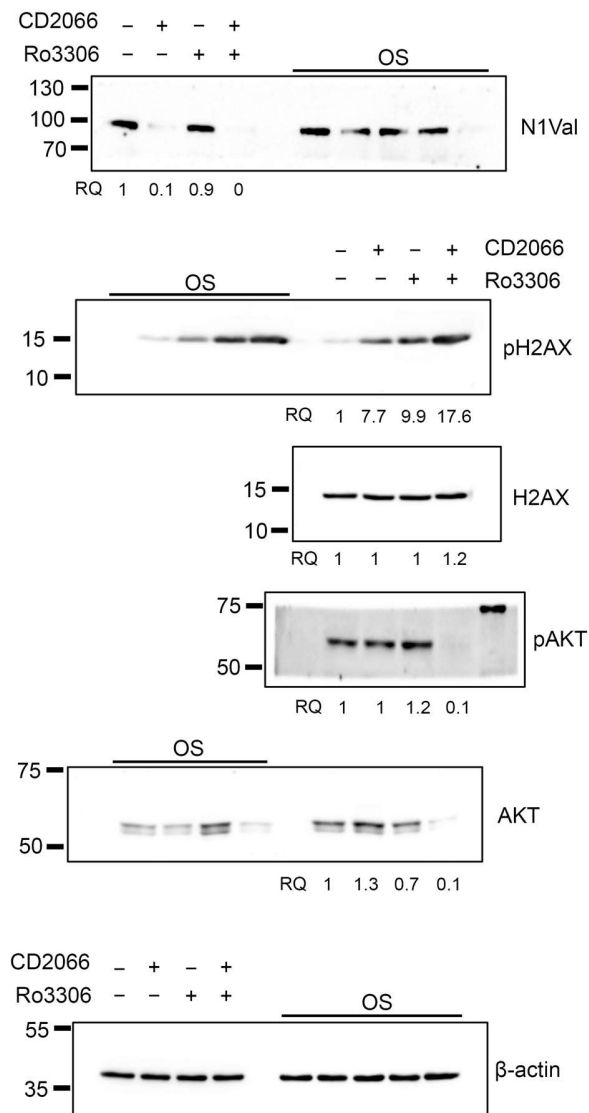

Figure continued on next page



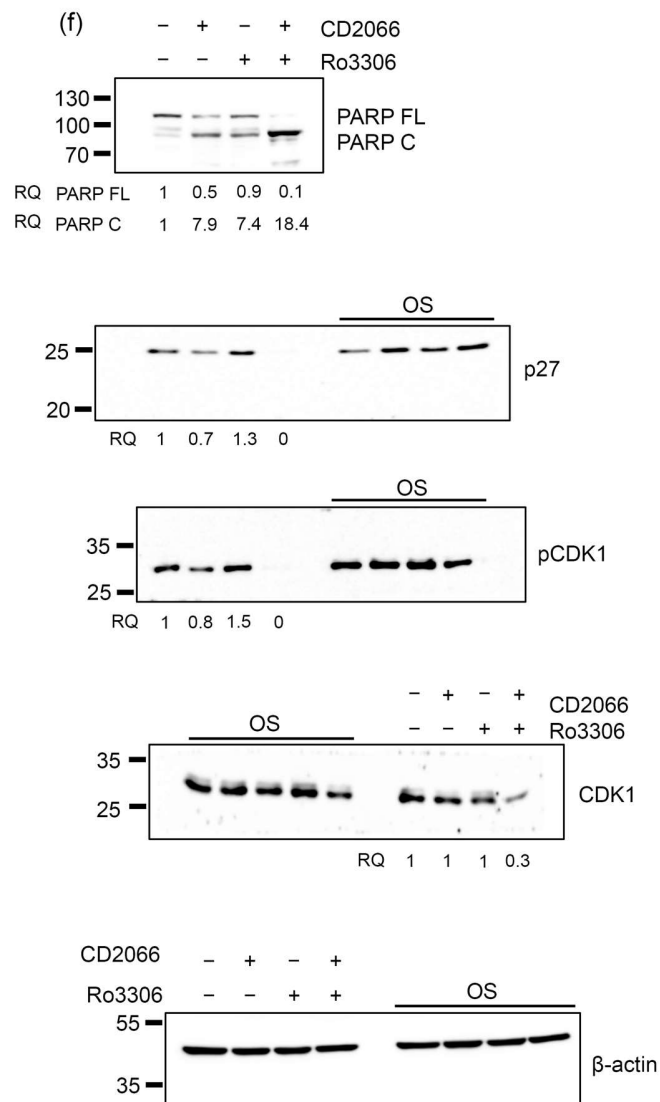

**Figure S22.** Uncropped Western Blots related to main Figure 12 e,f and relative quantification of proteins. The expression of each protein was analyzed by densitometry and presented in the figure as a ratio to the control sample (DMSO) normalized to  $\beta$ -actin (RQ). Other samples (OS).

**Table S1.** Sequences and annealing temperatures of primers for real-time RT-PCR.

| Gene Name | Primer Name   | Sequences 5'- 3'      | Annealing temperature |
|-----------|---------------|-----------------------|-----------------------|
| IER5      | IER5-Forward  | GACTCCTACGGAAAAGCCCC  | 60°                   |
|           | IER5-Reverse  | CTCTCAGCACCGGCTTATCG  | 60°                   |
| BAP1      | BAP1-Forward  | AGAGTACAGACACGGCCTCT  | 60°                   |
|           | BAP1-Reverse  | AGCAGCTCCTTGGGTGAGTAT | 60°                   |
| FEN1      | FEN1-Forward  | GCTACCGAGGACATGGACTG  | 60°                   |
|           | FEN1-Reverse  | TTCATTTGGCTCGCTCCACT  | 60°                   |
| RNF8      | RNF8-Forward  | AAGATGGGTGCGAGGTGACT  | 60°                   |
|           | RNF8-Reverse  | ACTGGCCACTTCACCTTTCC  | 60°                   |
| RAD51     | RAD51-Forward | ATACTGTGGAGGCTGTTGCC  | 60°                   |
|           | RAD51-Reverse | AGTTGCAGTGGTGAAACCCA  | 60°                   |
| PCNA      | PCNA-Forward  | CTGAGGGCTTCGACACCTAC  | 60°                   |
|           | PCNA-Reverse  | CGCGTTATCTTCGGCCCTTA  | 60°                   |
| 18S       | 18S-Forward   | CACGCCAGTACAAGATCCGA  | 60°                   |
|           | 18S-Reverse   | TTCACGGAGCTTGTTGTCCA  | 60°                   |
